# Supplementary material
Source: PubMed Central journal article supplement (PMC10122045)
Supplement: mmc1.pdf [file mmc1.pdf]

iScience, Volume 26

## **Supplemental information**

**Neurosensory anatomy and function in**

***Dimetrodon*, the first terrestrial apex predator**

**Kayla D. Bazzana-Adams, David C. Evans, and Robert R. Reisz**

| Taxon                  | Flexure | Flocculus | SCC | Cochlea | Source(s)                                                                                           |
|------------------------|---------|-----------|-----|---------|-----------------------------------------------------------------------------------------------------|
| <i>Aerosaurus</i>      | 17      | 1         | 1   | 0       | Bazzana et al 2021 J Anatomy                                                                        |
| <i>Mesenosaurus</i>    | 18      | 1         | 1   | 0       | Bazzana et al 2021 J Anatomy                                                                        |
| <i>Dimetrodon</i>      | 43      | 1         | 1   | 0       | this paper                                                                                          |
| <i>Lemurosaurus</i>    | 85      | 1         | 0   | 0       | Benoit et al 2017 Palaeontologia Africana;<br>Benoit et al 2017 Brain Behaviour<br>Evolution        |
| <i>Herpetoskylax</i>   | 72      | 1         | 0   | 0       | Benoit et al 2017 Palaeontologia Africana                                                           |
| <i>Hipposaurus</i>     | 66      | 1         | 0   | 0       | Benoit et al 2017 Palaeontologia Africana                                                           |
| <i>Moschops</i>        | 58      | 1         | 1   | 0       | Benoit et al 2017 PeerJ; Benoit et al 2017<br>Brain Behaviour Evolution                             |
| <i>Lystrosaurus</i>    | 59      | 0         | 1   | 0       | Hopson 1979 Biology of the Reptilia;<br>Benoit et al 2017 Palaeontologia Africana                   |
| <i>Pristerodon</i>     | 46      | 1         | 1   | 1       | Benoit et al 2017 Palaeontologia Africana;<br>Laass 2015 J Morphology                               |
| <i>Choerosaurus</i>    |         |           | 2   | 1       | ear endocast STL provided by Julien<br>Benoit                                                       |
| <i>Microgomphodon</i>  |         |           | 1   | 1       | Benoit et al 2017 Palaeontologia Africana                                                           |
| <i>Galesaurus</i>      | 44      | 1         | 1   | 1       | Pusch et al 2019 J Anatomy                                                                          |
| <i>Thrinaxodon</i>     | 37      | 1         | 1   | 1       | Macrini 2006 PhD dissertation; Benoit et<br>al 2017 Palaeontologia Africana                         |
| <i>Diademodon</i>      | 31      | 1         |     | 1       | Watson 1913 Ann Mag Natural History;<br>Macrini 2006 PhD dissertation                               |
| <i>Exaeretodon</i>     | 22      | 0         |     |         | Pavanatto et al 2019 J Morphology                                                                   |
| <i>Massetognathus</i>  | 59      | 1         | 1   | 1       | Benoit et al 2017 Palaeontologia Africana;<br>Hoffmann et al 2021 Historical Biology                |
| <i>Trirachodon</i>     | 25      | 1         | 1   | 1       | Hopson 1979 Biology of the Reptilia;<br>Pavanatto et al 2019 J Morphology                           |
| <i>Probainognathus</i> | 33      | 0         | 1   | 1       | Quiroga 1980 Ameghiniana; Hoffman<br>2018 MSc thesis                                                |
| <i>Pseudotherium</i>   | 42      | 1         | 1   | 1       | Wallace 2018 PhD dissertation                                                                       |
| <i>Riograndia</i>      | 39      | 0         | 1   | 1       | Rodrigues et al 2019 Historical Biology;<br>ear endocast segmented for this study                   |
| <i>Brasilodon</i>      | 52      | 1         | 1   | 1       | Rodrigues et al 2013 J Mammalian<br>Evolution, Rodrigues et al 2014<br>Palaontologische Zeitschrift |
| <i>Tritylodon</i>      | 59      | 1         | 1   | 1       | Du Plessis 2010 MSc thesis; ear endocast<br>STL provided by Julien Benoit                           |
| <i>Hadrocodium</i>     | 26      | 1         | 1   | 1       | Macrini 2006 PhD dissertation; ear<br>endocast segmented for this study                             |
| <i>Megazostrodon</i>   |         |           | 1   | 1       | ear endocast STL provided by Julien<br>Benoit                                                       |
| <i>Morganucodon</i>    | 45      | 1         | 2   | 1       | Rowe et al 2011 Science; Luo et al 2016<br>Evolution of the Vertebrate Ear                          |

**Data S1.** Data used in the ancestral state reconstructions, including source information. Related to Figures 4 and 5, and to the code provided in the STAR Methods.

## References

1. Bazzana, K.D., Evans, D.C., Bevitt, J.J., and Reisz, R.R. (2021). Neurosensory anatomy of Varanopidae and its implications for early synapsid evolution. *J Anat* 240, 833-849.

2. Benoit, J., Fernandez, V., Manger, P.R., and Rubidge, B.S. (2017) Endocranial casts of pre-mammalian therapsids reveal an unexpected neurological diversity at the deep evolutionary root of mammals. *Brain Behav Evol* 90, 311-333.
3. Benoit, J., Manger, P.R., Fernandez, V., and Rubidge, B.S. (2017). The bony labyrinth of late Permian Biarmosuchia: Palaeobiology and diversity in non-mammalian Therapsida. *Palaeontol Afr* 52, 58-77.
4. Benoit, J., Manger, P.R., Norton, L., Fernandez, V., and Rubidge, B.S. (2017). Synchrotron scanning reveals the palaeoneurology of the head-butting *Moschops capensis* (Therapsida, Dinocephalia). *PeerJ* 5, e3496.
5. Du Plessis, D. (2010). An examination of non-mammalian cynodont cranial endocasts. MSc thesis, University of the Free State.
6. Hoffmann, S., O'Conner, P.M., Kirk, E.C., Wible, J.R., and Krause, D.W. (2014). Endocranial and inner ear morphology of *Vintana sertichi* (Mammalia, Gondwanatheria) from the Late Cretaceous of Madagascar. *J Vert Paleontol* 34, 110-137.
7. Hoffman, E.A. (2018). Large clutch of Jurassic mammalian morph perinates and evolution of mammalian reproduction and growth. MSc thesis, University of Texas at Austin.
8. Hoffmann, C.A., Rodrigues, P.G., Soares, M.B., and Andrade, M.B. (2021). Brain endocast of two non-mammaliaform cynodonts from southern Brazil: an ontogenetic and evolutionary approach. *Hist Biol* 33, 1196-1207.
9. Hurum, J.H. (1998). The inner ear of two Late Cretaceous multituberculate mammals, and its implications for multituberculate hearing. *J Mamm Evol* 5, 65-93.
10. Kielan-Jaworowska, Z., Presley, R., and Poplin, C. (1986). The cranial vascular system in taeniolabidoid multituberculate mammals. *Phil Trans R Soc Lond B: Biol Sci* 313, 525-602.
11. Laass, M. (2015). Virtual reconstruction and description of the cranial endocast of *Pristerodon mackayi* (Therapsida, Anomodontia). *J Morph* 276, 1089-1099.
12. Luo, Z.-X., and Ketten, D.R. (1991) CT scanning and computerized reconstructions of the inner ear of multituberculate mammals. *J Vert Paleontol* 11, 220-228.
13. Macrini, T.E. (2006). The evolution of endocranial space in mammals and non-mammalian cynodonts. PhD Dissertation, University of Texas at Austin.
14. Macrini, T.E., Rowe, T., and Archer, M. (2006). Description of a cranial endocast from a fossil platypus, *Obdurodon dicksoni* (Monotremata, Ornithorhynchidae), and the relevance of endocranial characters to monotreme monophyly. *J Morph* 267, 1000-1015.
15. Macrini, T.E., Rougier, G.W., and Rowe, T. (2007). Description of a cranial endocast from the fossil mammal *Vincelestes neuquenianus* (Therapsida) and its relevance to the evolution of endocranial characters in therians. *Anat Rec* 290, 875-892.
16. Pavanatto, A.E.B., Kerber, L., and Dias-da-Silva, S. (2019) Virtual reconstruction of cranial endocasts of traversodontid cynodonts (Eucynodontia: Gomphodontia) from the upper Triassic of Southern Brazil. *J Morph* 280, 1267-1281.
17. Quiroga, J.C. (1980) Sobre un molde endocraneano del cinodonte *Probainognathus jenseni* Romer, 1970 (Reptilia, Therapsida) de la Formacion Ischichuca (Triasico Medio), La Rioja, Argentina. *Ameghiniana* 17, 181-190.
18. Rodrigues, P.G., Ruf, I., and Schultz, C.L. (2013) Digital reconstruction of the otic region and inner ear of the non-mammalian cynodont *Brasilitherium riograndensis* (Late

Triassic, Brazil) and its relevance to the evolution of the mammalian ear. *J Mamm Evol* 20, 291-307.

19. Rodrigues, P.G., Ruf, I., and Schultz, C.L. (2014) Study of a digital cranial endocast of the non-mammaliaform cynodont *Brasilitherium riograndensis* (Later Triassic, Brazil) and its relevance to the evolution of the mammalian brain. *PalZ* 88, 329-352.
20. Rodrigues, P.G., Martinelli, A.G., Schultz, C.L., Corfe, I.J., Gill, P.G., Soares, M.B., and Rayfield, E.J. (2019). Digital cranial endocast of *Riograndia guaibensis* (Late Triassic, Brazil) sheds light on the evolution of the brain in non-mammalian cynodonts. *Hist Biol* 31, 1195-1212.
21. Ruf, I., Luo, Z.-X., Wible, J.R., and Martin, T. (2009) Petrosal anatomy and inner ear structures of the Later Jurassic *Henkelotherium* (Mammalia, Cladotheria, Dryolestoidea): Insight into the early evolution of the ear region in cladotherian mammals. *J Anat* 214, 679-693.
22. Wallace, R.V.S. (2018) A new close mammal relative and evolution of the mammalian central nervous system. PhD Dissertation, University of Texas at Austin.
23. Watson, D.M.S. (1913) XXV. - Further notes on the skull, brain, and organs of special sense of *Diademodon*. *Ann Mag Nat Hist* 12, 217-228.
